# Supplementary material for: Comparison of Nutri-Score and Health Star Rating Nutrient Profiling Models Using Large Branded Foods Composition Database and Sales Data
Source: MDPI journal article supplement (doi:10.3390/ijerph20053980), 2023-02-23
Supplement: s1 [file s1]

## Supplementary Material S1. Offering and sales-weighted distribution and alignment between Nutri-Score and Health Star Rating across 2020 Slovenian food supply.

| Category                                     | Nutri-Score <sup>a</sup> (%) |              |              |              |              | Health Star Rating <sup>a</sup> (%) |              |              |              |              | % of Agreement <sup>a</sup> | $\kappa$    | $\rho$ <sup>b</sup> |
|----------------------------------------------|------------------------------|--------------|--------------|--------------|--------------|-------------------------------------|--------------|--------------|--------------|--------------|-----------------------------|-------------|---------------------|
|                                              | A                            | B            | C            | D            | E            | 4.5-5 *                             | 3.5-4 *      | 2.5-3 *      | 1.5-2 *      | 0.5-1 *      |                             |             |                     |
| <b>Total (n = 17,226)</b>                    | <b>10/26</b>                 | <b>12/26</b> | <b>20/8</b>  | <b>32/18</b> | <b>25/21</b> | <b>12/31</b>                        | <b>21/27</b> | <b>16/7</b>  | <b>22/11</b> | <b>29/24</b> | <b>70/81</b>                | <b>0.62</b> | <b>0.87</b>         |
| <b>Beverages (n = 1822)</b>                  | <b>10/43</b>                 | <b>11/5</b>  | <b>17/5</b>  | <b>22/11</b> | <b>39/37</b> | <b>12/43</b>                        | <b>10/4</b>  | <b>18/6</b>  | <b>23/11</b> | <b>38/36</b> | <b>94/98</b>                | <b>0.91</b> | <b>0.98</b>         |
| Juices (n = 349)                             | 0/0                          | 16/3         | 60/81        | 21/15        | 3/1          | 0/0                                 | 16/3         | 59/80        | 23/16        | 3/0          | 94/98                       | 0.89        | 0.94                |
| Nectars (n = 228)                            | 0/0                          | 4/2          | 8/0          | 9/7          | 79/91        | 0/0                                 | 4/3          | 13/4         | 14/15        | 70/78        | 86/81                       | 0.57        | 0.85                |
| Soft drinks (n = 1057)                       | 0/0                          | 13/10        | 8/5          | 29/20        | 50/66        | 3/1                                 | 11/9         | 8/5          | 29/20        | 49/65        | 94/98                       | 0.91        | 0.99                |
| Waters (n = 188)                             | 100/100                      | 0/0          | 0/0          | 0/0          | 0/0          | 100/100                             | 0/0          | 0/0          | 0/0          | 0/0          | 100/100                     | /           | /                   |
| <b>Bread and bakery products (n = 2304)</b>  | <b>7/5</b>                   | <b>8/34</b>  | <b>12/8</b>  | <b>34/24</b> | <b>40/28</b> | <b>2/1</b>                          | <b>15/41</b> | <b>13/11</b> | <b>33/23</b> | <b>37/25</b> | <b>82/85</b>                | <b>0.74</b> | <b>0.93</b>         |
| Biscuits (n = 1129)                          | 0/0                          | 1/1          | 6/5          | 33/33        | 60/61        | 0/0                                 | 2/3          | 8/4          | 35/41        | 55/52        | 88/87                       | 0.78        | 0.87                |
| Bread (n = 247)                              | 28/10                        | 46/80        | 19/6         | 6/4          | 0/0          | 6/1                                 | 74/90        | 16/8         | 3/1          | 0/0          | 68/85                       | 0.47        | 0.71                |
| Cakes, muffins & pastry (n = 543)            | 1/0                          | 1/1          | 8/3          | 49/50        | 42/46        | 0/0                                 | 3/1          | 11/10        | 47/45        | 39/44        | 85/90                       | 0.75        | 0.84                |
| Crispy bread (n = 291)                       | 23/17                        | 9/11         | 32/41        | 32/26        | 4/5          | 9/9                                 | 32/31        | 29/41        | 26/13        | 4/6          | 63/61                       | 0.52        | 0.89                |
| Other (n = 94)                               | 10/10                        | 24/32        | 19/21        | 40/34        | 6/2          | 1/1                                 | 34/42        | 21/34        | 38/22        | 5/1          | 82/75                       | 0.75        | 0.95                |
| <b>Cereal and cereal products (n = 547)</b>  | <b>36/31</b>                 | <b>8/8</b>   | <b>39/35</b> | <b>17/27</b> | <b>0/0</b>   | <b>29/24</b>                        | <b>28/20</b> | <b>33/36</b> | <b>10/20</b> | <b>0/0</b>   | <b>69/79</b>                | <b>0.57</b> | <b>0.86</b>         |
| Breakfast cereals (n = 484)                  | 28/18                        | 9/9          | 44/41        | 19/32        | 0/0          | 20/11                               | 31/24        | 38/42        | 11/23        | 0/0          | 66/75                       | 0.53        | 0.83                |
| Cereal flakes and bran (n = 63)              | 97/100                       | 2/0          | 2/0          | 0/0          | 0/0          | 94/99                               | 5/1          | 2/0          | 0/0          | 0/0          | 94/99                       | 0.31        | 0.35                |
| <b>Confectionery (n = 2283)</b>              | <b>1/0</b>                   | <b>2/1</b>   | <b>7/1</b>   | <b>34/36</b> | <b>56/62</b> | <b>1/0</b>                          | <b>3/1</b>   | <b>7/1</b>   | <b>19/9</b>  | <b>69/89</b> | <b>80/72</b>                | <b>0.63</b> | <b>0.76</b>         |
| Chocolate and sweets (n = 2104)              | 1/0                          | 2/1          | 7/1          | 29/32        | 61/67        | 1/0                                 | 4/1          | 7/1          | 14/4         | 74/95        | 79/71                       | 0.59        | 0.74                |
| Jelly candy (n = 179)                        | 1/0                          | 1/0          | 4/0          | 93/100       | 0/0          | 1/0                                 | 1/0          | 6/1          | 79/86        | 13/13        | 86/87                       | 0.46        | 0.61                |
| <b>Convenience foods (n = 750)</b>           | <b>20/40</b>                 | <b>27/25</b> | <b>34/24</b> | <b>18/11</b> | <b>2/0</b>   | <b>2/0</b>                          | <b>51/68</b> | <b>34/23</b> | <b>11/8</b>  | <b>2/0</b>   | <b>68/53</b>                | <b>0.56</b> | <b>0.87</b>         |
| Pizza (n = 73)                               | 0/0                          | 16/15        | 53/67        | 30/18        | 0/0          | 0/0                                 | 22/24        | 62/66        | 16/9         | 0/0          | 81/82                       | 0.67        | 0.81                |
| Pre-prepared salads and sandwiches (n = 137) | 17/5                         | 25/28        | 35/39        | 23/27        | 0/0          | 0/0                                 | 47/35        | 38/41        | 15/23        | 0/0          | 69/90                       | 0.56        | 0.88                |
| Ready meals (n = 304)                        | 19/31                        | 34/46        | 30/19        | 16/4         | 1/0          | 2/0                                 | 59/81        | 29/16        | 7/2          | 3/0          | 65/62                       | 0.50        | 0.83                |
| Side dishes (n = 236)                        | 29/61                        | 22/5         | 33/21        | 14/12        | 3/0          | 4/0                                 | 50/69        | 30/22        | 12/9         | 3/0          | 67/32                       | 0.57        | 0.89                |
| <b>Dairy and imitates (n = 3203)</b>         | <b>11/16</b>                 | <b>24/64</b> | <b>20/7</b>  | <b>38/13</b> | <b>6/1</b>   | <b>27/33</b>                        | <b>29/52</b> | <b>14/5</b>  | <b>12/2</b>  | <b>18/8</b>  | <b>53/70</b>                | <b>0.42</b> | <b>0.64</b>         |
| Cheese and processed cheese (n = 827)        | 0/0                          | 1/0          | 12/10        | 82/87        | 5/3          | 35/44                               | 28/22        | 8/9          | 6/4          | 22/21        | 8/5                         | 0.01        | 0.38                |
| Cheese imitates (n = 34)                     | 0/0                          | 3/0          | 3/0          | 12/30        | 82/70        | 0/0                                 | 3/0          | 3/0          | 6/0          | 88/99        | 94/70                       | 0.78        | 0.82                |
| Cottage cheese (n = 78)                      | 47/26                        | 33/62        | 19/12        | 0/0          | 0/0          | 73/80                               | 22/20        | 5/0          | 0/0          | 0/0          | 60/35                       | 0.30        | 0.75                |
| Cream (n = 155)                              | 0/0                          | 0/0          | 11/24        | 86/76        | 3/0          | 0/0                                 | 0/0          | 11/7         | 8/2          | 81/91        | 14/03                       | 0.03        | 0.26                |
| Cream imitates (n = 38)                      | 0/0                          | 37/9         | 11/0         | 53/90        | 0/0          | 0/0                                 | 37/9         | 18/13        | 16/5         | 29/73        | 55/14                       | 0.41        | 0.85                |
| Desserts (n = 192)                           | 9/6                          | 21/22        | 53/59        | 16/13        | 2/0          | 9/6                                 | 35/61        | 36/19        | 6/3          | 14/11        | 72/49                       | 0.61        | 0.88                |

|                                            |              |              |              |              |              |              |              |              |              |              |              |             |             |
|--------------------------------------------|--------------|--------------|--------------|--------------|--------------|--------------|--------------|--------------|--------------|--------------|--------------|-------------|-------------|
| Flavoured yogurt (n = 572)                 | 8/3          | 46/80        | 45/17        | 1/0          | 0/0          | 19/33        | 54/56        | 24/11        | 2/0          | 0/0          | 69/64        | 0.50        | 0.76        |
| Ice cream and edible ices (n = 568)        | 2/0          | 2/1          | 18/22        | 59/69        | 19/8         | 1/0          | 2/1          | 17/37        | 48/46        | 32/15        | 77/71        | 0.62        | 0.50        |
| Milk & milk drinks (n = 237)               | 35/20        | 59/79        | 5/0          | 0/0          | 1/0          | 43/27        | 48/72        | 3/0          | 4/0          | 1/0          | 82/93        | 0.68        | 0.81        |
| Milk imitates (n = 185)                    | 18/12        | 71/86        | 3/1          | 7/1          | 1/0          | 16/9         | 74/90        | 2/0          | 8/1          | 1/0          | 94/96        | 0.85        | 0.92        |
| Plain yogurt (n = 274)                     | 38/25        | 50/67        | 11/8         | 0/0          | 0/0          | 83/90        | 8/2          | 9/7          | 0/0          | 0/0          | 53/33        | 0.26        | 0.61        |
| Yogurt imitates (n = 43)                   | 37/51        | 30/29        | 28/19        | 5/1          | 0/0          | 49/59        | 23/23        | 14/0         | 9/18         | 5/1          | 70/72        | 0.57        | 0.90        |
| <b>Edible oils and emulsions (n = 587)</b> | <b>0/0</b>   | <b>0/0</b>   | <b>43/20</b> | <b>39/65</b> | <b>18/15</b> | <b>3/2</b>   | <b>45/72</b> | <b>27/6</b>  | <b>3/3</b>   | <b>22/17</b> | <b>35/22</b> | <b>0.22</b> | <b>0.63</b> |
| Butter (n = 67)                            | 0/0          | 0/0          | 0/0          | 9/3          | 91/97        | 0/0          | 0/0          | 0/0          | 4/1          | 96/99        | 93/98        | 0.41        | 0.44        |
| Cooking oils (n = 465)                     | 0/0          | 0/0          | 51/21        | 40/77        | 9/1          | 2/0          | 54/91        | 33/8         | 1/0          | 10/1         | 27/06        | 0.11        | 0.40        |
| Margarine (n = 55)                         | 0/0          | 0/0          | 27/36        | 67/63        | 5/1          | 15/19        | 22/28        | 9/2          | 18/32        | 36/18        | 27/35        | 0.13        | 0.72        |
| <b>Fish and fish products (n = 577)</b>    | <b>16/7</b>  | <b>21/25</b> | <b>25/19</b> | <b>36/49</b> | <b>2/1</b>   | <b>7/3</b>   | <b>50/47</b> | <b>17/22</b> | <b>18/28</b> | <b>8/1</b>   | <b>55/58</b> | <b>0.41</b> | <b>0.81</b> |
| Canned fish and seafood (n = 387)          | 3/1          | 19/22        | 30/21        | 45/57        | 3/1          | 2/0          | 47/43        | 21/24        | 22/32        | 9/1          | 51/57        | 0.34        | 0.77        |
| Processed chilled fish products (n = 81)   | 14/36        | 27/45        | 23/13        | 36/6         | 0/0          | 0/0          | 44/84        | 20/10        | 26/3         | 10/3         | 73/58        | 0.63        | 0.94        |
| Unprocessed chilled fish (n = 109)         | 64/57        | 23/36        | 9/0          | 4/7          | 0/0          | 29/42        | 66/51        | 4/7          | 1/0          | 0/0          | 54/78        | 0.30        | 0.55        |
| <b>Fruit and vegetables (n = 1452)</b>     | <b>28/41</b> | <b>20/26</b> | <b>37/22</b> | <b>15/10</b> | <b>0/0</b>   | <b>34/46</b> | <b>29/30</b> | <b>18/11</b> | <b>17/11</b> | <b>2/1</b>   | <b>67/81</b> | <b>0.57</b> | <b>0.84</b> |
| Canned fruit (n = 115)                     | 23/12        | 65/87        | 10/1         | 2/1          | 0/0          | 7/9          | 78/85        | 11/5         | 3/1          | 0/0          | 78/93        | 0.53        | 0.71        |
| Dried fruit (n = 279)                      | 9/14         | 23/29        | 57/51        | 11/6         | 0/0          | 11/14        | 33/38        | 31/33        | 16/8         | 8/7          | 59/78        | 0.43        | 0.79        |
| Dried vegetables (n = 21)                  | 67/11        | 19/5         | 14/84        | 0/0          | 0/0          | 81/16        | 19/84        | 0/0          | 0/0          | 0/0          | 71/11        | 0.33        | 0.78        |
| Frozen fruit (n = 43)                      | 100/100      | 0/0          | 0/0          | 0/0          | 0/0          | 100/100      | 0/0          | 0/0          | 0/0          | 0/0          | 100/100      | /           | /           |
| Frozen vegetables (n = 129)                | 100/100      | 0/0          | 0/0          | 0/0          | 0/0          | 100/100      | 0/0          | 0/0          | 0/0          | 0/0          | 100/100      | /           | /           |
| Jam and spreads (n = 324)                  | 3/1          | 6/2          | 51/38        | 40/59        | 0/0          | 0/0          | 10/2         | 37/26        | 52/71        | 0/0          | 82/86        | 0.70        | 0.82        |
| Nuts and fruit mixes (n = 109)             | 13/1         | 41/60        | 41/40        | 5/0          | 0/0          | 28/16        | 58/84        | 12/0         | 3/0          | 0/0          | 48/46        | 0.23        | 0.65        |
| Nuts and seeds (n = 432)                   | 33/29        | 19/32        | 37/33        | 11/5         | 1/1          | 53/53        | 32/40        | 8/4          | 6/1          | 2/1          | 50/49        | 0.31        | 0.78        |
| <b>Meat and meat products (n = 1890)</b>   | <b>7/5</b>   | <b>4/4</b>   | <b>8/11</b>  | <b>37/58</b> | <b>44/23</b> | <b>4/3</b>   | <b>15/15</b> | <b>6/8</b>   | <b>33/58</b> | <b>42/17</b> | <b>71/73</b> | <b>0.57</b> | <b>0.85</b> |
| Animal fat products (n = 69)               | 0/0          | 0/0          | 0/0          | 0/0          | 100/100      | 0/0          | 1/0          | 3/0          | 14/3         | 81/97        | 81/97        | /           | /           |
| Meat alternatives (n = 158)                | 37/55        | 15/17        | 24/18        | 21/11        | 3/0          | 16/24        | 56/59        | 12/7         | 13/9         | 3/0          | 51/42        | 0.39        | 0.77        |
| Processed meat & meat spreads (n = 1584)   | 1/1          | 2/4          | 7/11         | 42/63        | 48/22        | 0/0          | 10/13        | 6/8          | 38/63        | 46/15        | 72/73        | 0.55        | 0.79        |
| Unprocessed meat (n = 79)                  | 71/89        | 20/0         | 9/11         | 0/0          | 0/0          | 53/71        | 47/29        | 0/0          | 0/0          | 0/0          | 73/71        | 0.50        | 0.67        |
| <b>Sauces and spreads (n = 1207)</b>       | <b>10/10</b> | <b>11/11</b> | <b>33/23</b> | <b>30/20</b> | <b>15/35</b> | <b>5/4</b>   | <b>21/21</b> | <b>27/21</b> | <b>25/25</b> | <b>22/29</b> | <b>71/76</b> | <b>0.62</b> | <b>0.83</b> |
| Mayonnaise and dressings (n = 108)         | 0/0          | 0/0          | 14/3         | 41/7         | 45/89        | 0/0          | 0/0          | 15/3         | 63/55        | 22/42        | 72/53        | 0.55        | 0.73        |
| Nut spreads (n = 68)                       | 28/41        | 3/3          | 37/44        | 26/12        | 6/0          | 37/46        | 28/42        | 7/5          | 24/8         | 4/0          | 57/49        | 0.47        | 0.94        |
| Sauces (n = 785)                           | 10/15        | 14/19        | 38/33        | 30/31        | 8/1          | 4/6          | 22/31        | 30/33        | 23/27        | 21/3         | 71/78        | 0.61        | 0.81        |
| Sweet spreads (n = 95)                     | 0/0          | 0/0          | 3/0          | 22/5         | 75/95        | 0/0          | 2/0          | 5/1          | 16/1         | 77/98        | 89/96        | 0.73        | 0.84        |
| Vegetable spreads (n = 151)                | 13/12        | 19/13        | 38/68        | 29/8         | 0/0          | 1/0          | 38/50        | 42/45        | 16/5         | 4/0          | 67/60        | 0.54        | 0.87        |
| <b>Snack foods (n = 604)</b>               | <b>2/2</b>   | <b>2/0</b>   | <b>21/24</b> | <b>53/51</b> | <b>21/23</b> | <b>1/2</b>   | <b>6/1</b>   | <b>27/32</b> | <b>45/56</b> | <b>20/9</b>  | <b>75/68</b> | <b>0.62</b> | <b>0.82</b> |

κ—Cohen's Kappa; rho—Spearman Rank Correlation; <sup>a</sup>—presented as availability of products/sales-weighted; <sup>b</sup>—all results are statistically significant ( $p < 0.05$ ). \* refers to stars of Health Star Rating grades.
